# Supplementary material for: Loss of GD1-positive Lactobacillus correlates with inflammation in human lungs with COPD
Source: HighWire-hosted journal article supplement (doi:10.1136/bmjopen-2014-006677), 2015-02-01
Supplement: bmjopen-2014-006677supp.pdf [file bmjopen-2014-006677supp.pdf]

## SUPPLEMENTARY TABLES

### Online Data Supplement:

#### Methods:

#### *qPCR Analysis:*

**Table S1:** qPCR Standard Curve Formulas

|         | <b>16S Total Bacteria Assay</b> | <b><i>Lactobacillus</i> Assay</b> |
|---------|---------------------------------|-----------------------------------|
| Plate 1 | $y = -3.25x + 29.03$            | $y = -3.15x + 30.65$              |
| Plate 2 | $y = -3.29x + 29.53$            | $y = -3.22x + 30.75$              |

#### *qPCR Plate Correction:*

In order to accurately compare plates against each other four samples were run on both plates and the plate that gave larger values was divided by the plate with smaller values to obtain a multiplicative factor. This was averaged for all four samples and an average multiplicative factor was obtained and used for all samples in the plate with smaller values. This was done for both the 16S total bacteria assay and the *Lactobacillus* assay.

*Quantitative Histology:*

**Table S2:** Immunostaining of Inflammatory Cells\*

| Antibody Name                         | Antibody Type | Host Species | Against | Company | Catalog Number | Clone Name  | Dilution | Pre-Treatment      |
|---------------------------------------|---------------|--------------|---------|---------|----------------|-------------|----------|--------------------|
| CD1a+<br>(Langerhans Cell)            | Monoclonal    | Mouse        | Human   | DAKO    | MS3571         | 010         | 1/50     | Acetone 10 min. RT |
| CD35+<br>(Dendritic Reticulum Cell)   | Monoclonal    | Mouse        | Human   | DAKO    | M0846          | Ber-MAC-DRC | 1/75     | Acetone 10 min. RT |
| CD68+<br>(Macrophage)                 | Monoclonal    | Mouse        | Human   | DAKO    | M0718          | EBM11       | 1/100    | Acetone 10 min. RT |
| CD79 $\alpha$ + (B-lymphocyte)        | Monoclonal    | Mouse        | Human   | DAKO    | M7050          | JCB117      | 1/75     | Acetone 10 min. RT |
| CD8+<br>(Cytotoxic T-lymphocyte)      | Monoclonal    | Mouse        | Human   | DAKO    | M7103          | C8/144b     | 1/50     | Acetone 10 min. RT |
| NK1+<br>(Natural Killer Cell)         | Monoclonal    | Mouse        | Human   | DAKO    | M1014          | DAKO-NK1    | 1/100    | Acetone 10 min. RT |
| Neutrophil Elastase<br>(Neutrophil)   | Monoclonal    | Mouse        | Human   | DAKO    | M752           | NP57        | 1/50     | Acetone 10 min. RT |
| CD4+<br>(Helper-inducer T-lymphocyte) | Monoclonal    | Mouse        | Human   | DAKO    | M0716          | MT310       | 1/100    | Acetone 10 min. RT |

\* Hansel stain used for Eosinophils

For both intraobserver and interobserver error assessment twenty slides were chosen at random spanning all the different inflammatory groups that were analyzed. Values with zero were omitted from the comparison and analysis of intra- and inter- observer error.

**Results:**

**Table S3: Breakdown of adequate qPCR samples used for the analysis by relative location in the lung**

|         | Top | Middle | Bottom |
|---------|-----|--------|--------|
| Control | 18  | 21     | 12     |
| GOLD 1  | 13  | 15     | 8      |
| GOLD 2  | 18  | 19     | 12     |

**Table S4: List of P-values for Comparisons of Total Bacteria between different Lung Locations**

|         | Top vs. Middle | Top vs. Bottom | Middle vs. Bottom |
|---------|----------------|----------------|-------------------|
| Control | 0.54           | 0.90           | 0.65              |
| GOLD 1  | 0.30           | 0.72           | 0.45              |
| GOLD 2  | 0.69           | 0.50           | 0.60              |

**Table S5: Clinical characteristics separated by Lactobacillus positive or negative**

|                                        | Lactobacillus Positive<br>(mean $\pm$ SD) | Lactobacillus Negative<br>(mean $\pm$ SD) |
|----------------------------------------|-------------------------------------------|-------------------------------------------|
| Age                                    | 65.1 $\pm$ 9.0                            | 64.2 $\pm$ 10.0                           |
| Gender (M:F:Unknown)                   | 32:19:1                                   | 15:7                                      |
| FEV <sub>1</sub> /FVC                  | 67.6 $\pm$ 8.0                            | 70.7 $\pm$ 10.5                           |
| FEV <sub>1pp</sub> (percent predicted) | 86.1 $\pm$ 16.6                           | 88.6 $\pm$ 16.3                           |
| Smoking History (cigarette-years)      | 1014.5 $\pm$ 585.6                        | 818.9 $\pm$ 411.6                         |

## SUPPLEMENTARY FIGURES

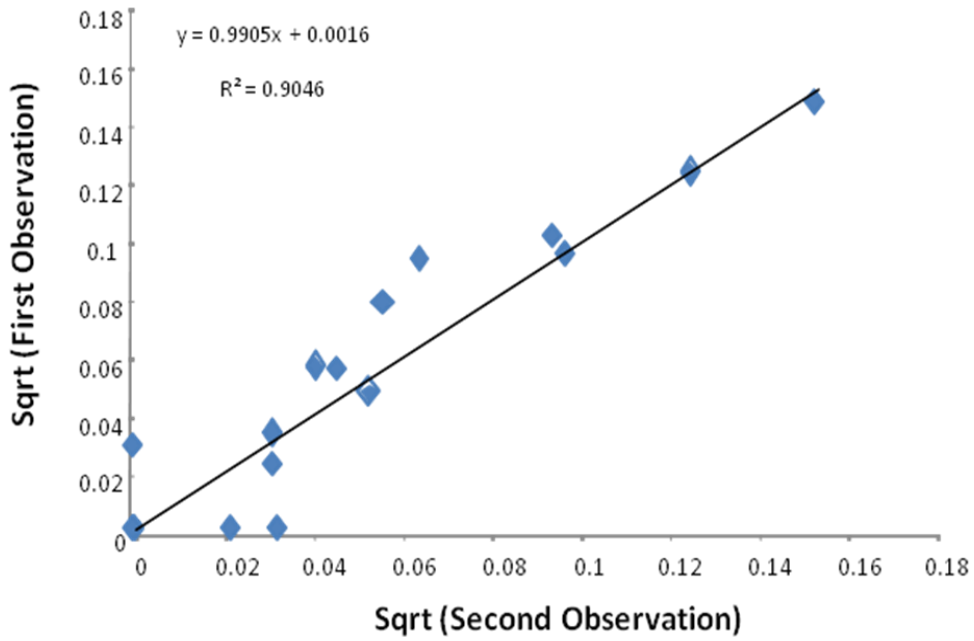

**Figure S1:** Intraobserver Error of Quantitative Histology Measurements of Vv in Small Airways. An  $R^2$  of 0.9046 was observed showing good repeatability between an individual.

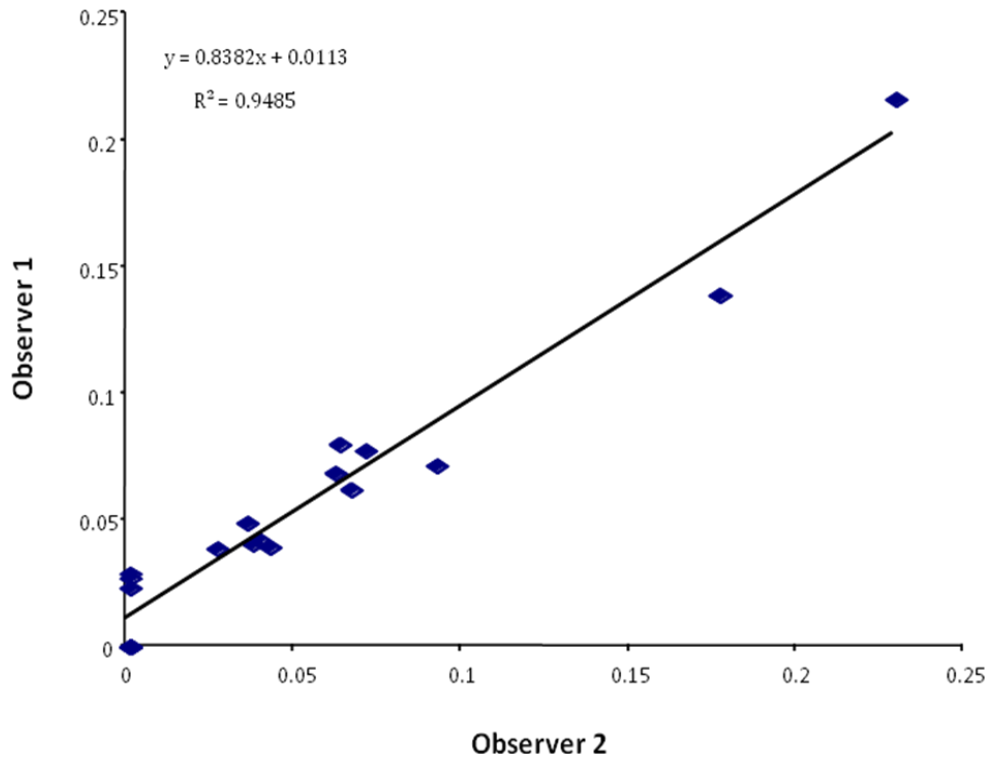

**Figure S2:** Interobserver Error of Quantitative Histology Measurements of Vv in Small Airways. An  $R^2$  of 0.9485 was observed showing good repeatability between two different individuals.

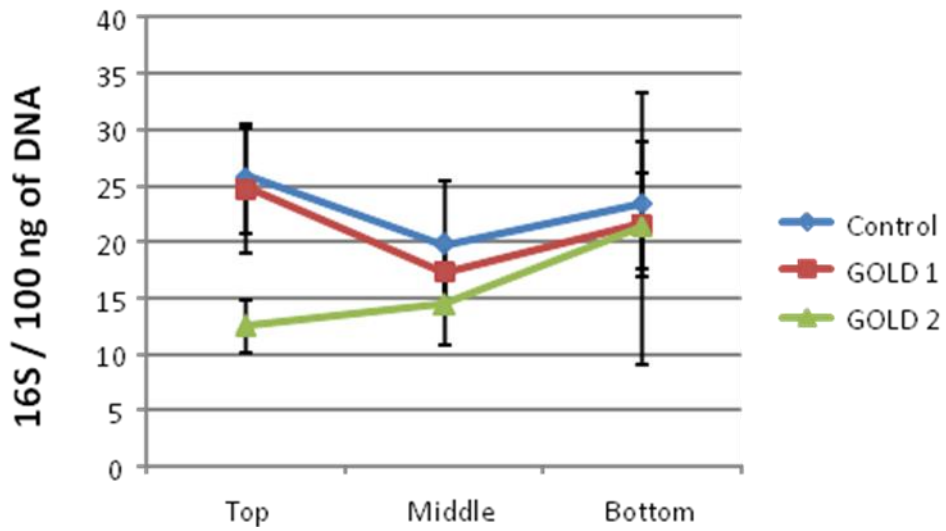

**Figure S3: Total bacteria by height and GOLD stage.** There is a trend for lower bacteria in the top of the lung in moderate COPD. However, no significant differences were found using ANOVA ( $P > 0.05$ ).

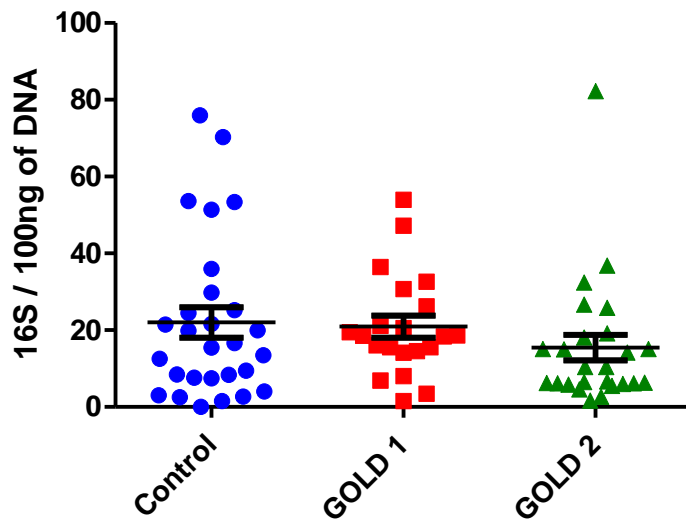

**Figure S4:** Average Bacterial Load per Group (error bars represent standard error). No significant difference was found in total bacteria by group ( $P > 0.05$ ). Controls  $n=28$ , GOLD 1  $n=21$ , and GOLD 2  $n=25$ .

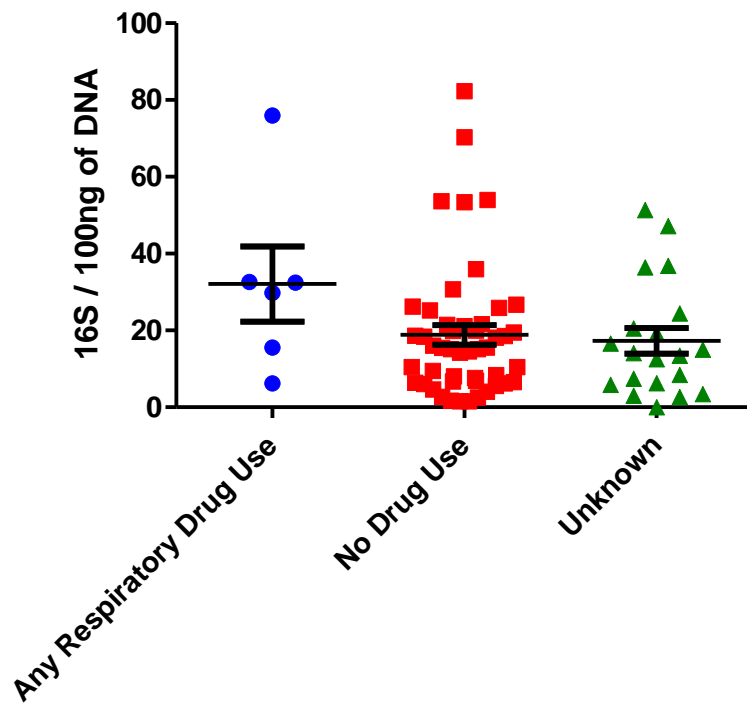

**Figure S5: Total bacteria according to drug usage.** No significant difference was found between the groups using ANOVA ( $P > 0.05$ )



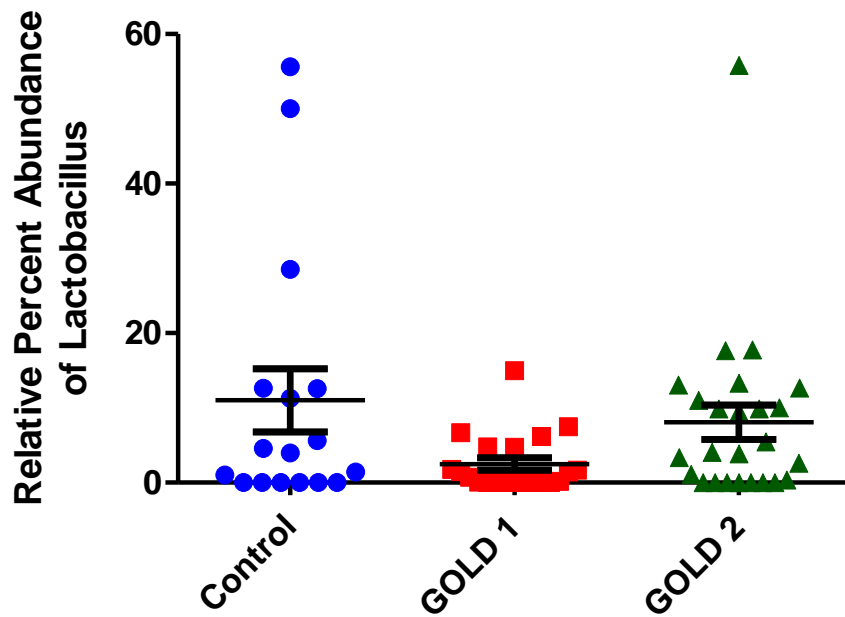

**Figure S6:** Average Lactobacillus abundance by sample group (error bars represent standard error). No significant difference was found between the three groups ( $P>0.05$ ). Controls  $n=28$ , GOLD 1  $n=21$ , GOLD 2  $n=25$ .

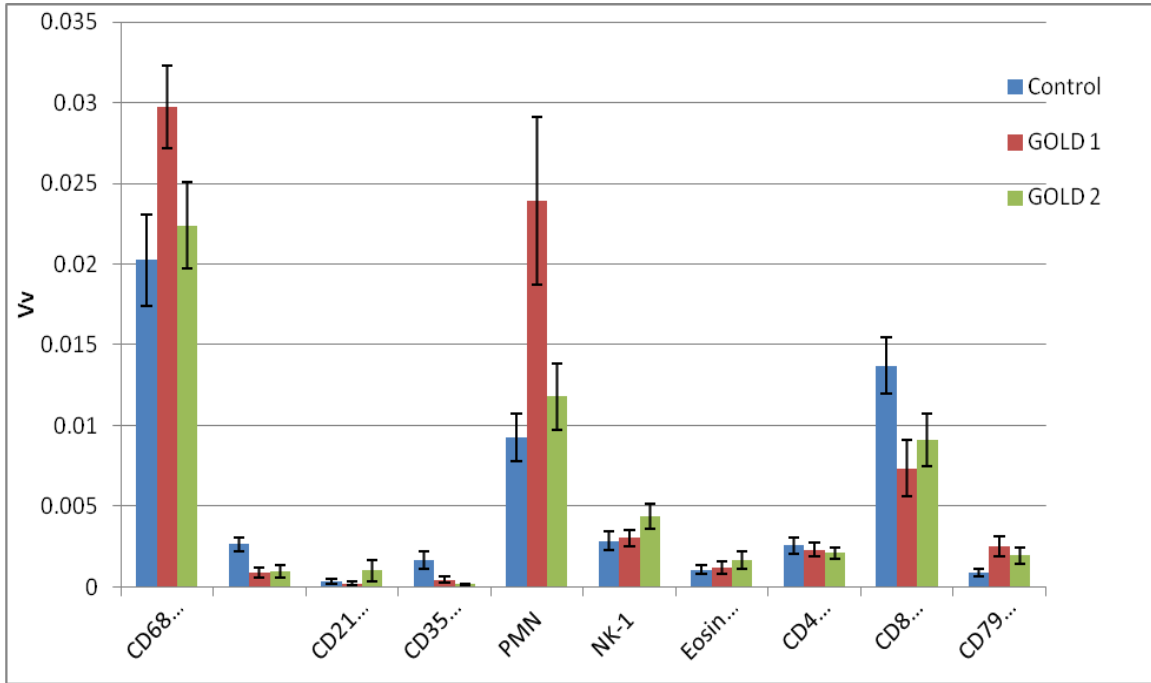

**Figure S7: Volume fraction of inflammatory cells separated by GOLD grade.** A significant difference was found between GOLD 1 and control for CD68+ macrophages and PMN ( $P < 0.05$ ) as well as GOLD 1 and GOLD 2 for CD68+ macrophages and PMN ( $P < 0.05$ ).

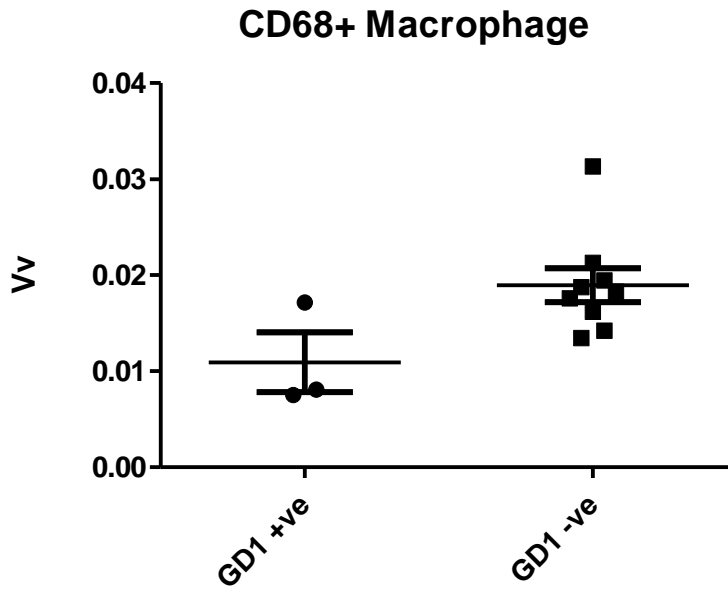

**Figure S8: Volume fraction of CD68+ macrophages in control samples by GD1 positivity.** There was an increased Vv in GD1 negative samples versus the positive group ( $P < 0.05$ ).

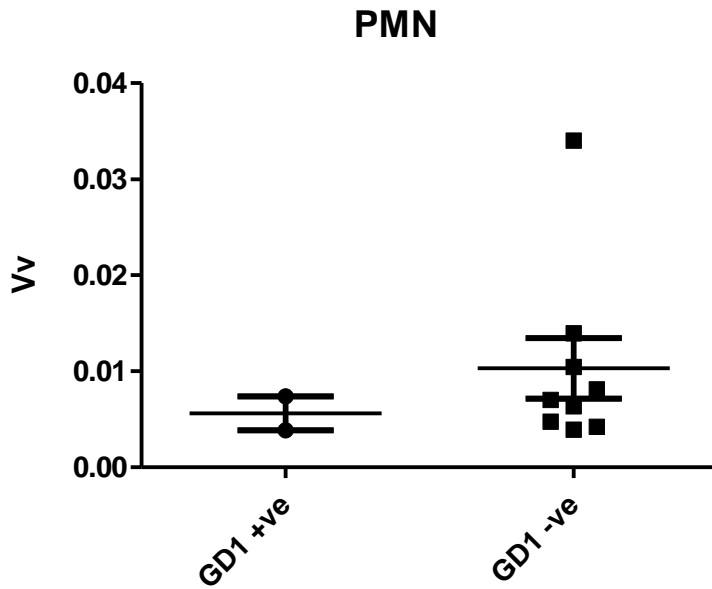

**Figure S9: Volume fraction of PMN in control samples by GD1 positivity.** There was a trend for increased Vv in GD1 negative samples versus the positive group ( $P > 0.05$ ).
